# Supplementary material for: Altered regulatory T-cell fractions and Helios expression in clinically isolated syndrome: clues to the development of multiple sclerosis
Source: PubMed Central journal article supplement (PMC5493587; doi:10.1038/cti.2017.18), 2017-05-26
Supplement: cti201718x1.pdf [file cti201718x1.pdf]

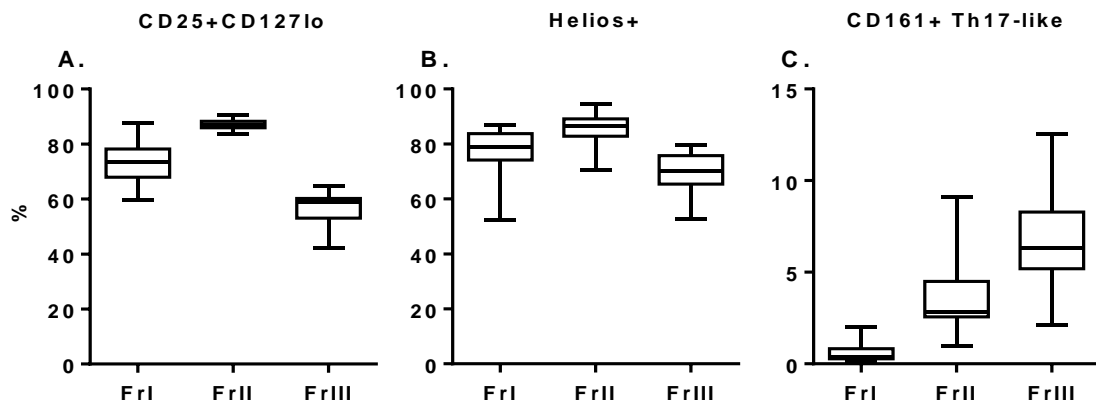

**Supplementary Figure 1.** Confirmation of Treg fraction functional characteristics based on surface and intracellular marker expression in PBMC samples from 19 healthy controls. The predominantly CD25+CD127lo (A) and Helios+ (B) phenotype of FcRI, together with a low percentage of CD161+ Th17-like Treg (C), is supportive of the “resting” designation given to these cells. FcRII contained the greatest proportion of CD25+CD127lo and Helios+ Treg, consistent with “activated” Treg possessing suppressive functionality. FcRIII, previously described as “cytokine-producing” non-Treg, had the lowest proportion of cells of a suppressive phenotype (CD25+CD127lo and Helios+), and the greatest frequency of CD161+ Th17-like Treg. Box-and-whisker plots are mean, IQR, and minimum and maximum values.

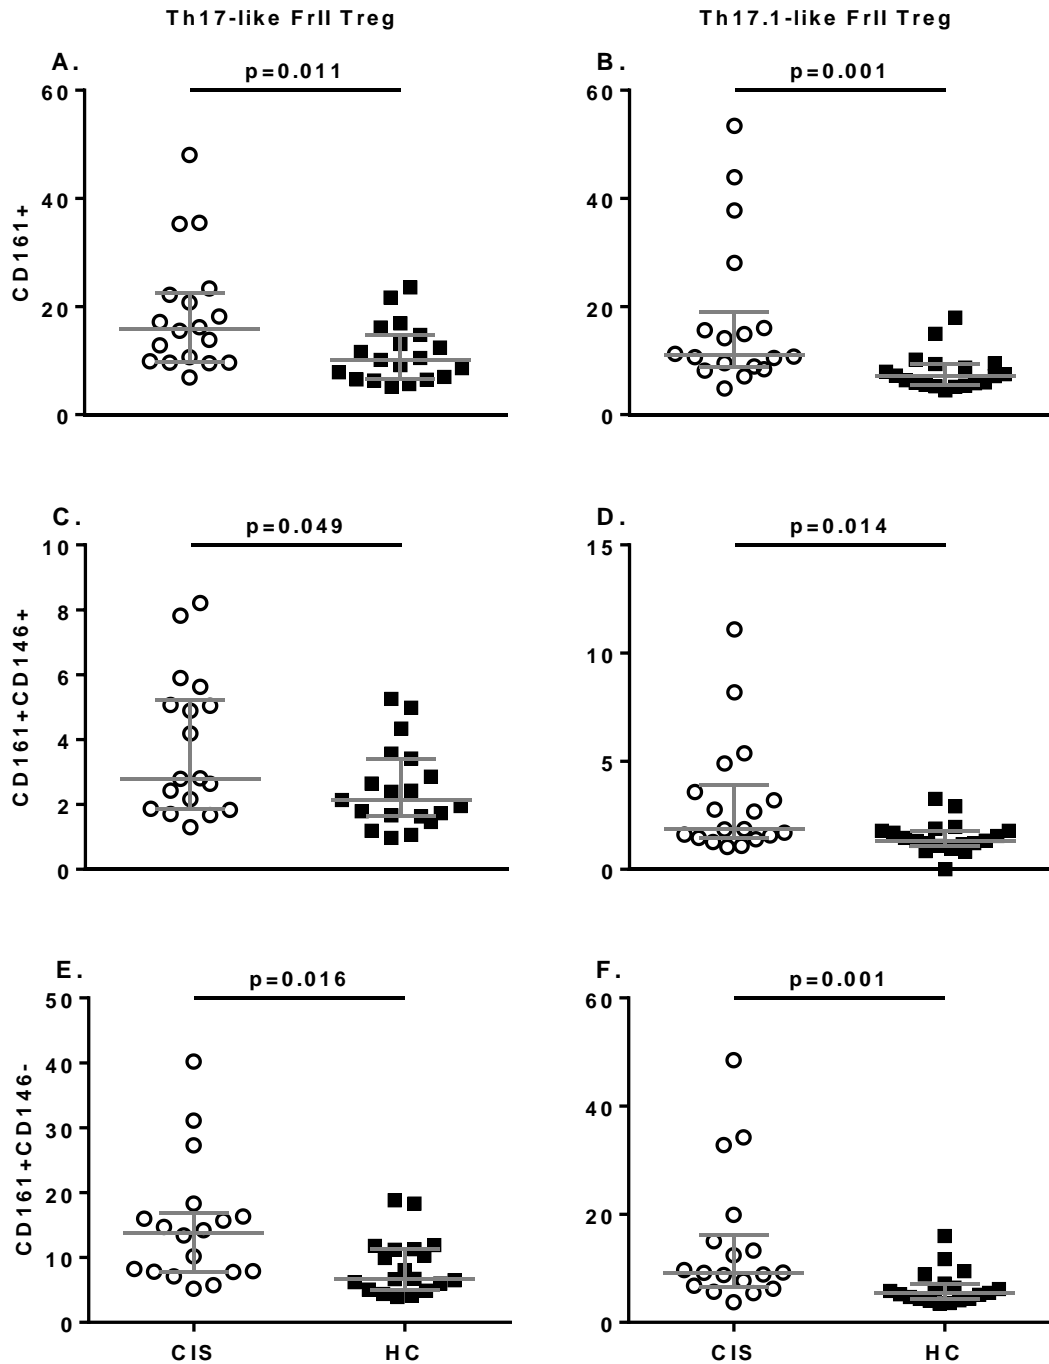

**Supplementary Figure 2.** Proinflammatory Th17- and Th17.1-like FrII Treg are present at greater frequency in CIS. The CIS group had a greater proportion of CD161+ Th17-like (A) and Th17.1-like (B) FrII Treg, including CD161+CD146- single-positive cells (E and F), indicating IL-17 production potential. The proportion of cells with a CD161+CD146+ double positive phenotype, associated with IL-17 and

GM-CSF production, was also greater in the CIS group (**C** and **D**). Data are median (IQR) for n=18 individuals with CIS (circles) and n=19 HC (squares).

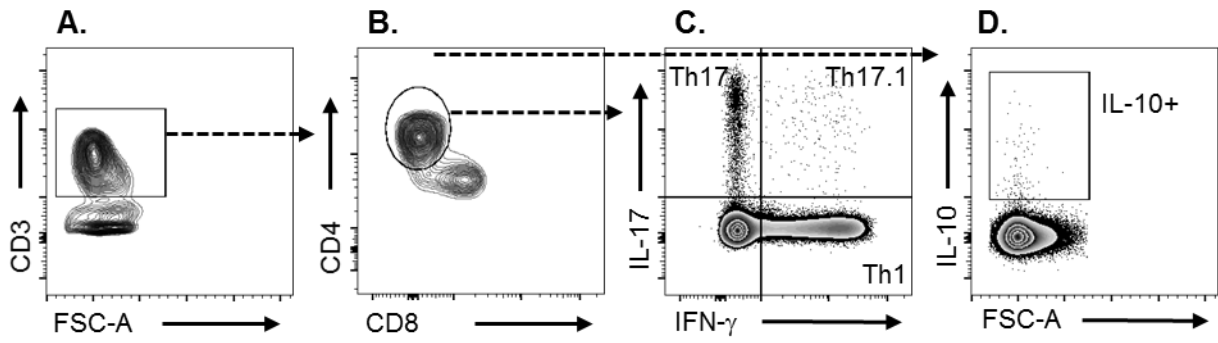

**Supplementary Figure 3.** Representative intracellular cytokine staining gating plots. Following dead cell and doublet exclusion, PBMCs were gated to identify CD3+CD4+CD8- T cells (**A** and **B**), which were subsequently analysed to obtain the percentage of Th1 (IFN- $\gamma$ +IL-17-), Th17 (IFN- $\gamma$ -IL-17+), and Th17.1 (IFN- $\gamma$ +IL-17+) (**C**) or IL-10+ cells (**D**).

**Supplementary Table 1.** Regulatory cell phenotype and Helios expression correlates with the frequency of Tfh EM cells and CD27-IgD- double-negative (DNB) cells

|                                                                                                                                                                               | Tfh1 EM  | Tfh2 EM  | Tfh17 EM | Tfh17.1 EM | DNB     |
|-------------------------------------------------------------------------------------------------------------------------------------------------------------------------------|----------|----------|----------|------------|---------|
| <b>% Treg</b>                                                                                                                                                                 |          |          |          |            |         |
| Frl                                                                                                                                                                           | -0.421*  | -0.467*  | -0.388†  | -0.395†    | -0.112  |
| <b>% Tfr</b>                                                                                                                                                                  |          |          |          |            |         |
| Frl                                                                                                                                                                           | -0.582** | -0.632** | -0.539** | -0.560**   | -0.137  |
| FrlII                                                                                                                                                                         | 0.599**  | 0.644**  | 0.576**  | 0.556**    | 0.256   |
| <b>Helios MFI - Treg</b>                                                                                                                                                      |          |          |          |            |         |
| Frl                                                                                                                                                                           | -0.594** | -0.578** | -0.562** | -0.594**   | -0.393† |
| FrlII                                                                                                                                                                         | -0.621** | -0.628** | -0.626** | -0.645**   | -0.349† |
| FrlIII                                                                                                                                                                        | -0.629** | -0.637** | -0.619** | -0.638**   | -0.426* |
| <b>Helios MFI - Tfr</b>                                                                                                                                                       |          |          |          |            |         |
| Frl                                                                                                                                                                           | -0.547** | -0.522** | -0.514** | -0.540**   | -0.364† |
| FrlII                                                                                                                                                                         | -0.540** | -0.538** | -0.570** | -0.589**   | -0.290  |
| FrlIII                                                                                                                                                                        | -0.575** | -0.570** | -0.568** | -0.588**   | -0.411† |
| Data are Pearson's correlation coefficient for n=37 (Tfh cells: n=18 CIS and n=19 HC) or n=36 individuals (DNB cells: n=18 CIS and n=18 HC). **p≤0.001, *(p<0.01), † (p<0.05) |          |          |          |            |         |
